# Supplementary material
Source: Royal Society of Chemistry journal article supplement (doi:10.1039/d5fo05286f)

## 2-Hydroxycinnamic acid

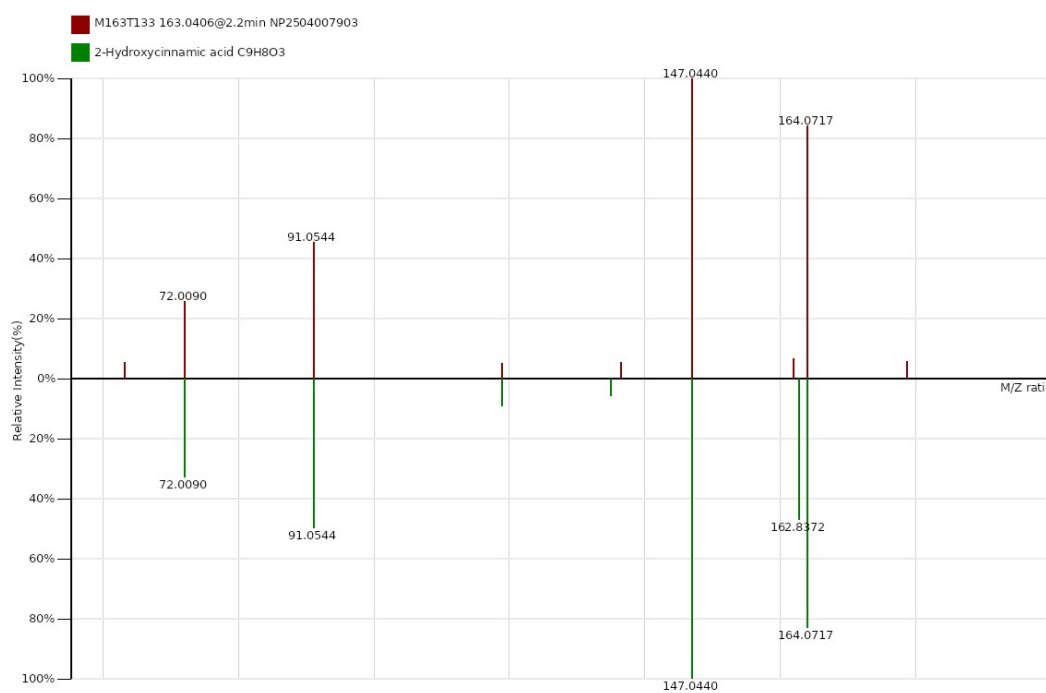

## 3-Dehydroquinic acid

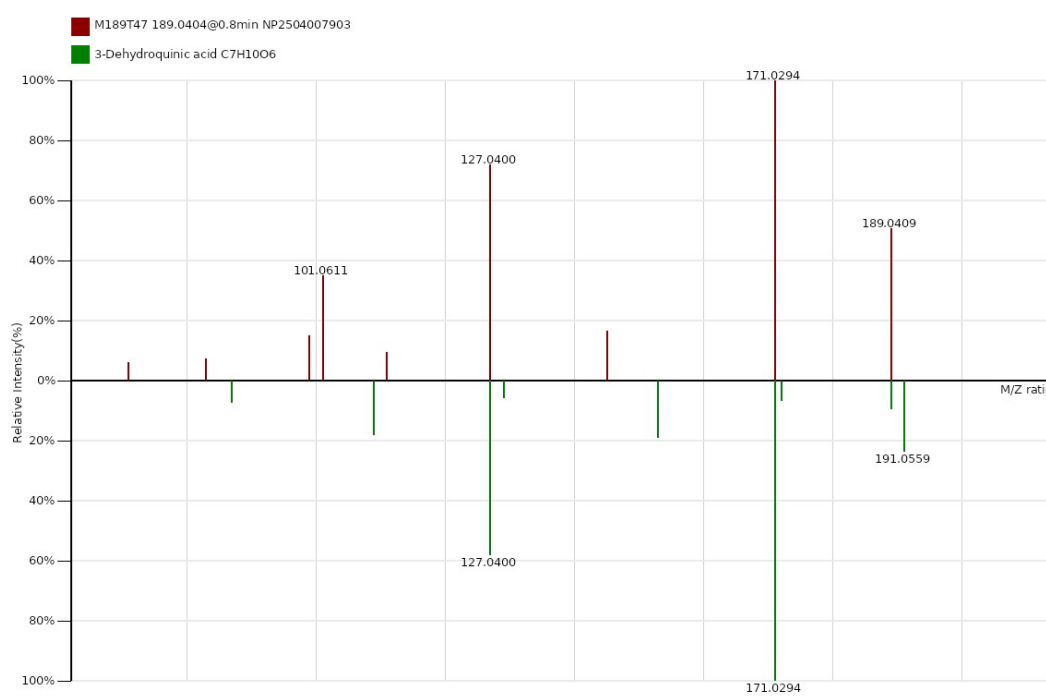

## 5-Hydroxy-L-tryptophan

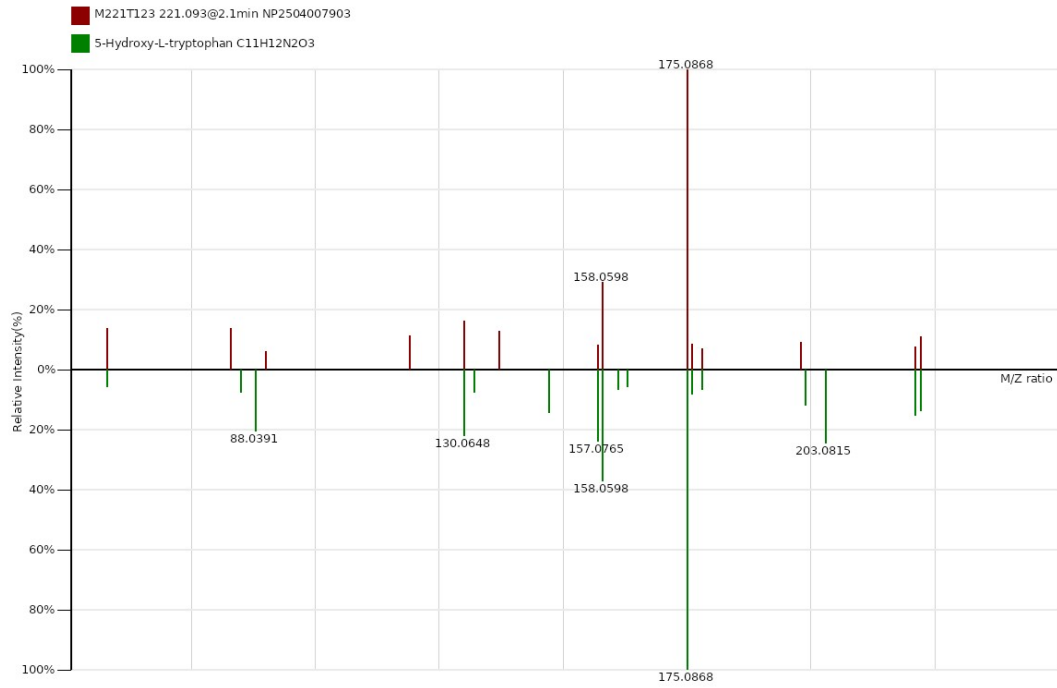

## beta-Alanyl-L-arginine

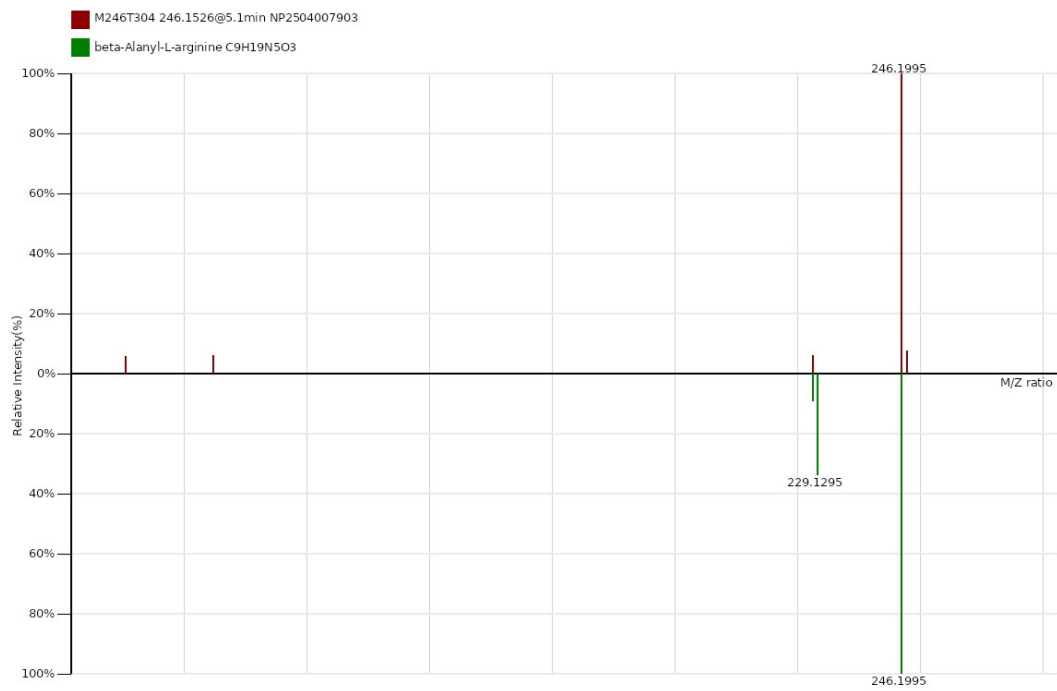

## Biotin

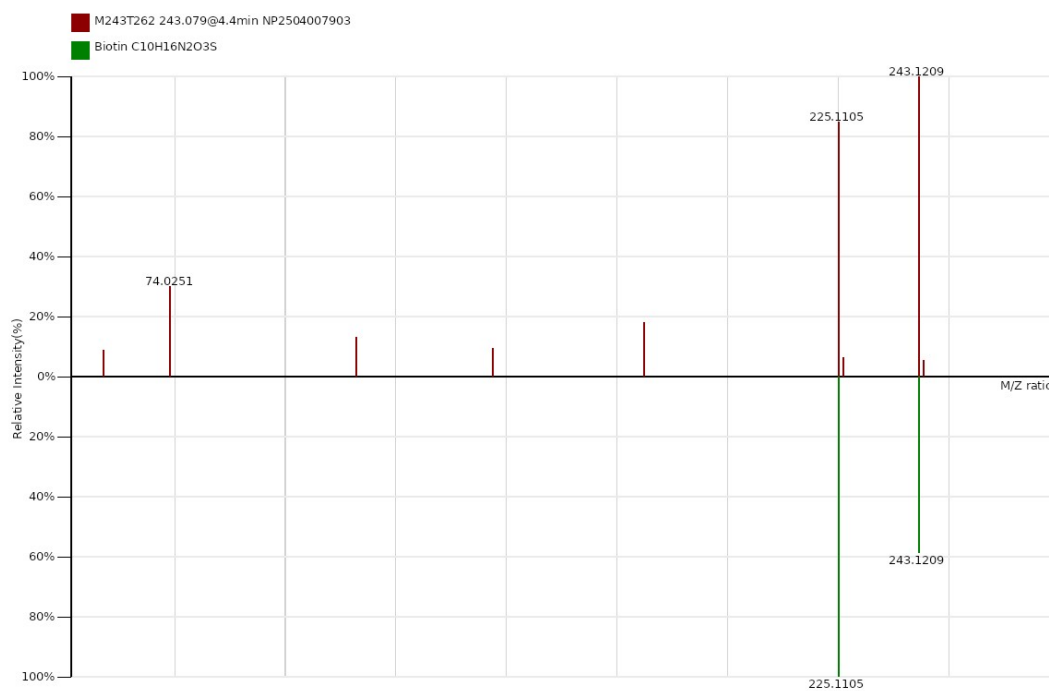

## Calcidiol

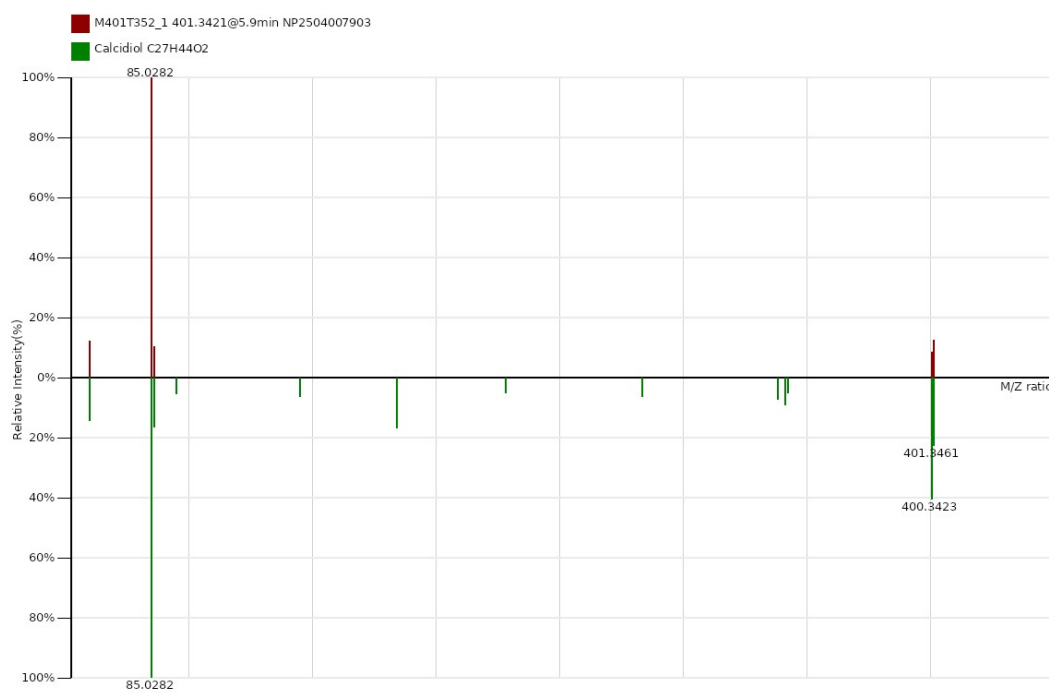

## Creatine

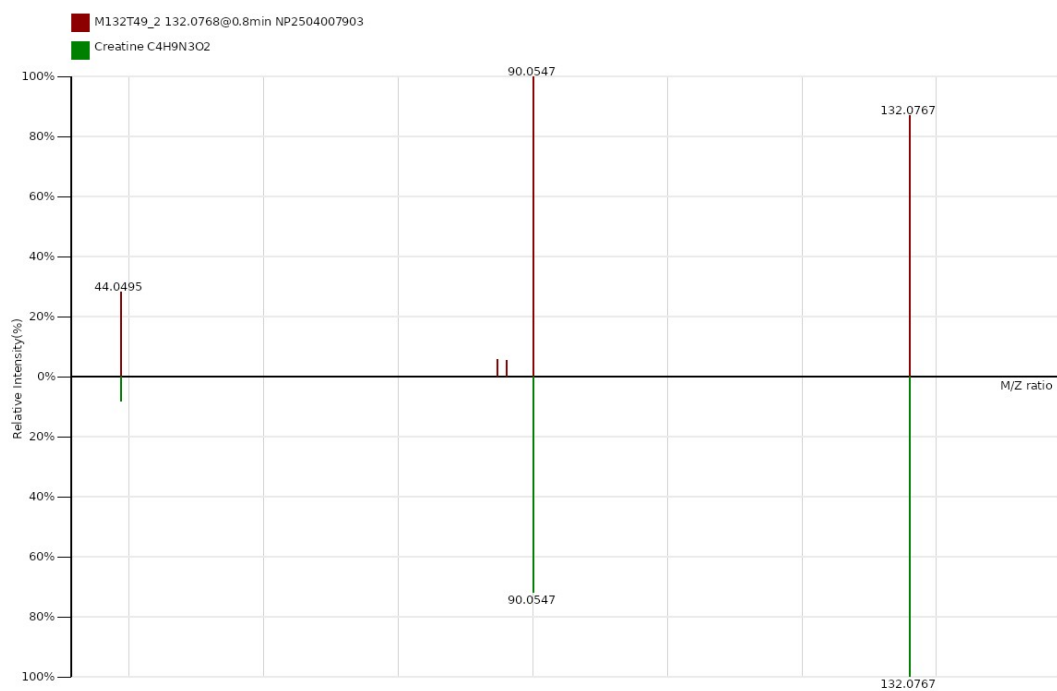

## Dopamine

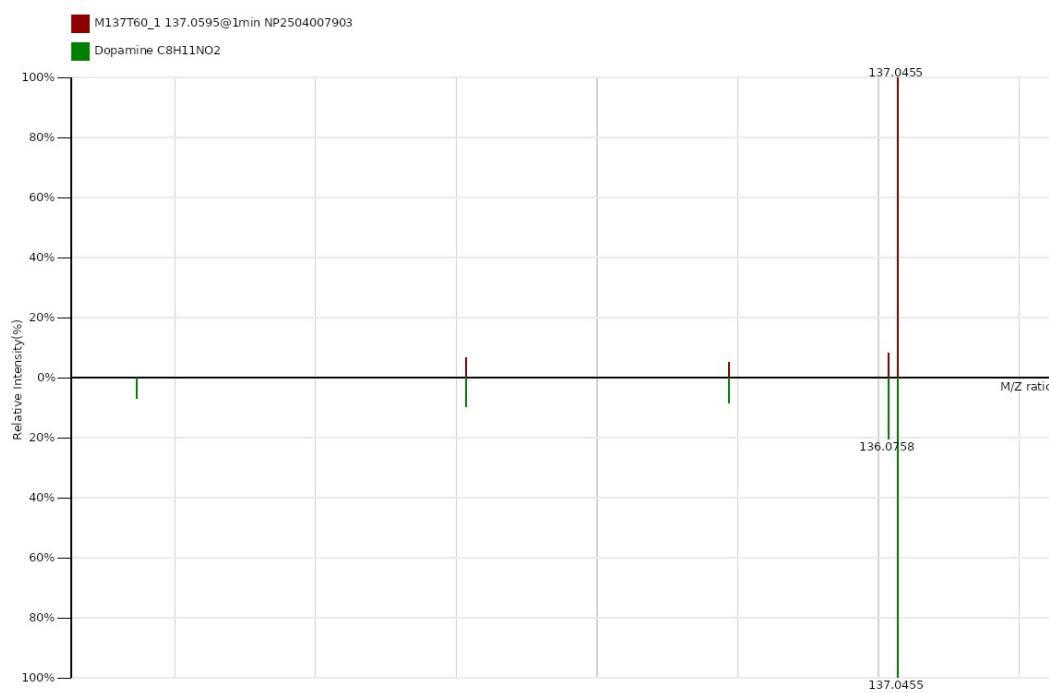

## Kynurenic acid

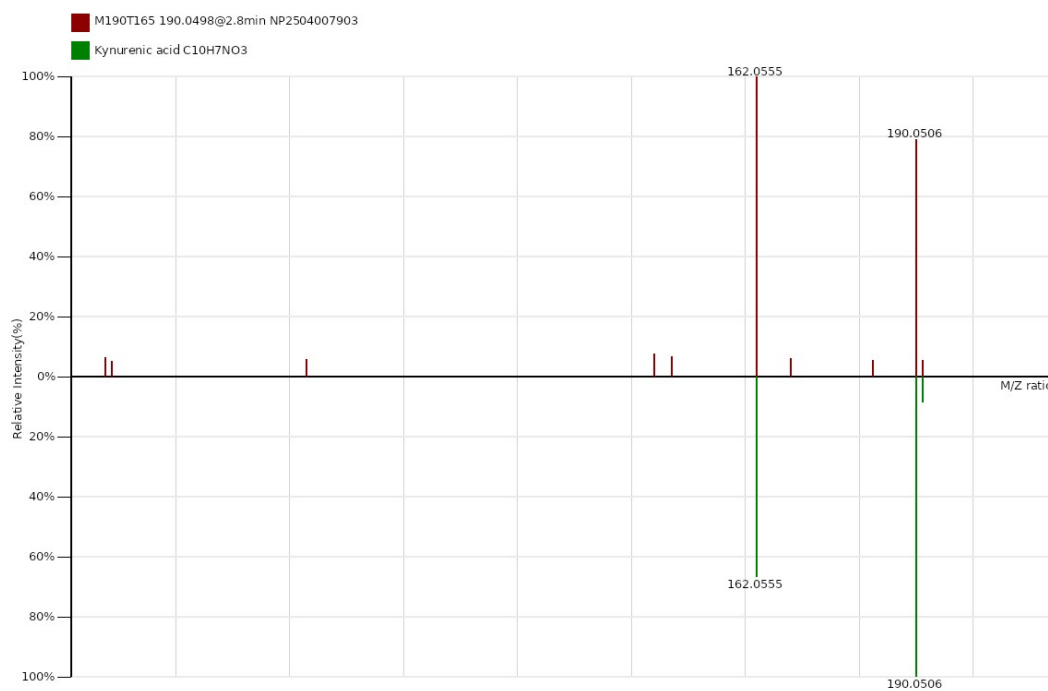

## L-Arginine

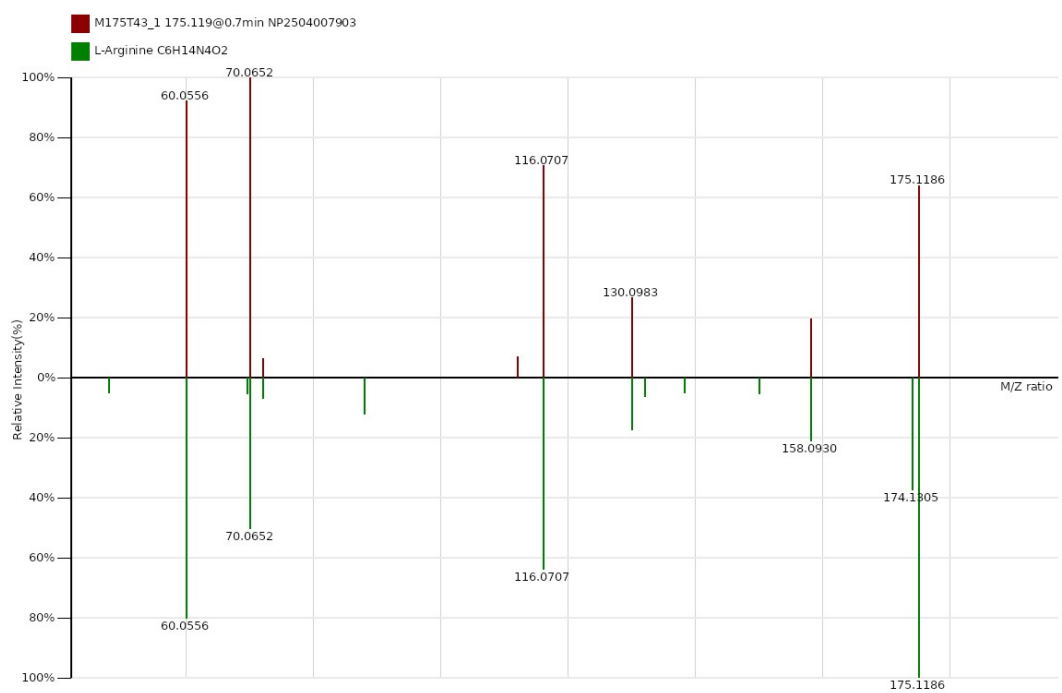

## L-Kynurenine

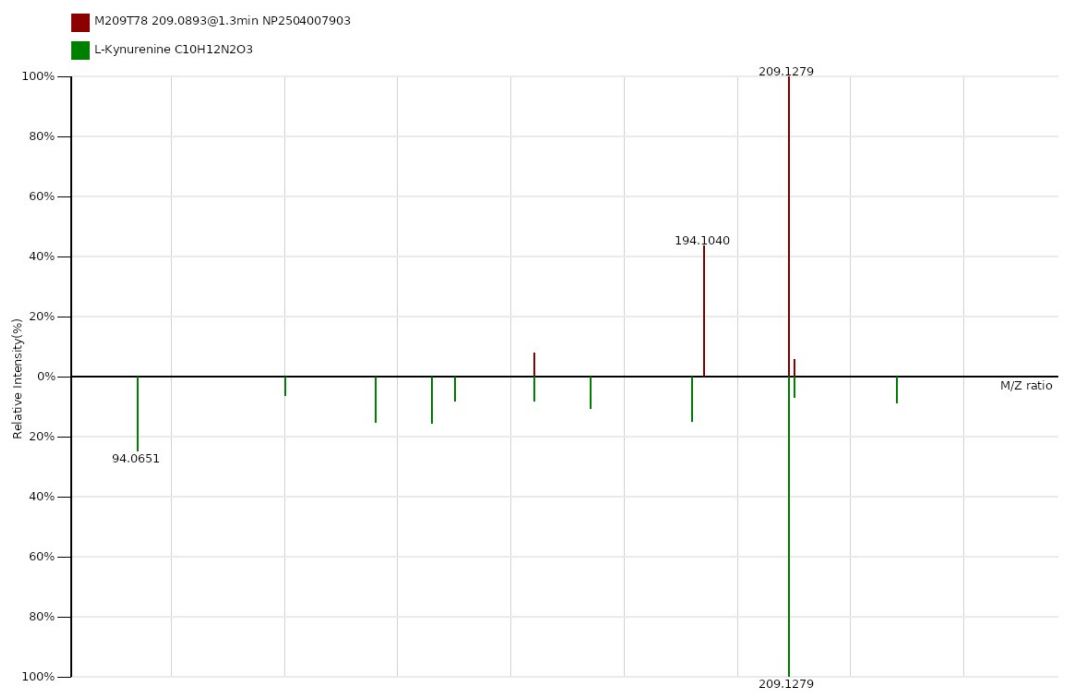

## L-Lysine

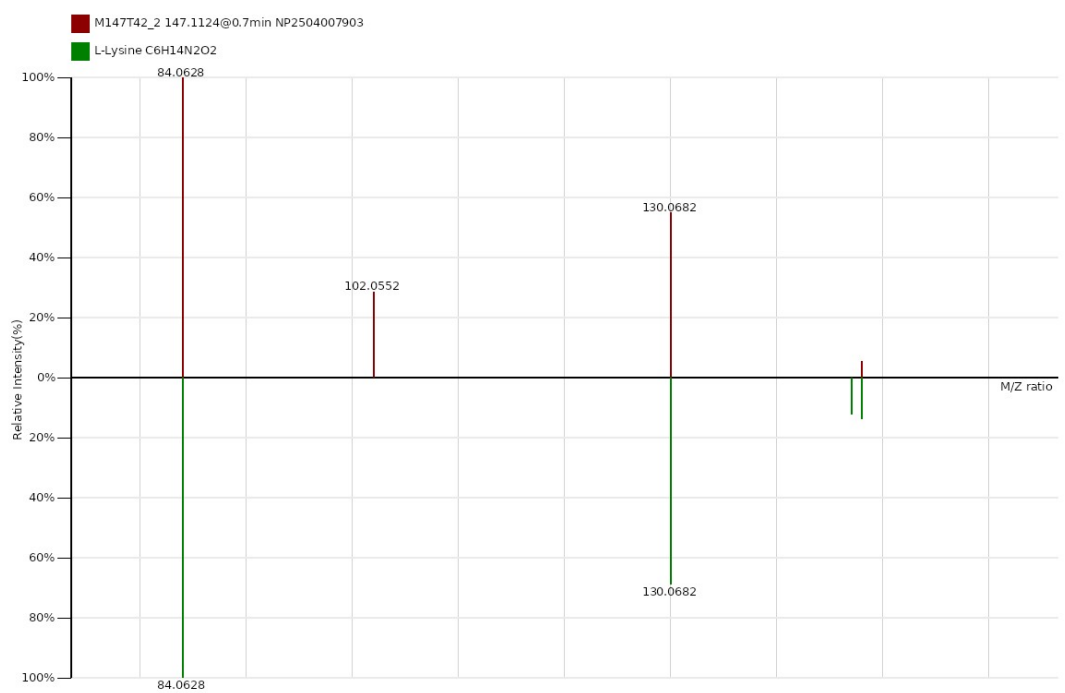

## L-Phenylalanine

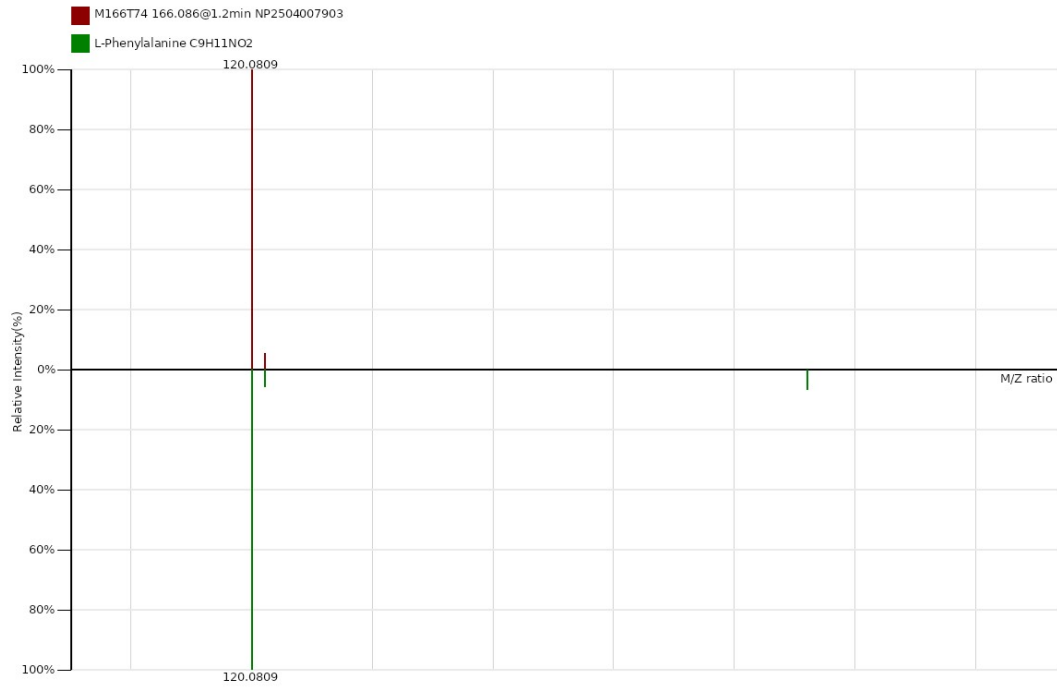

## L-Tryptophan

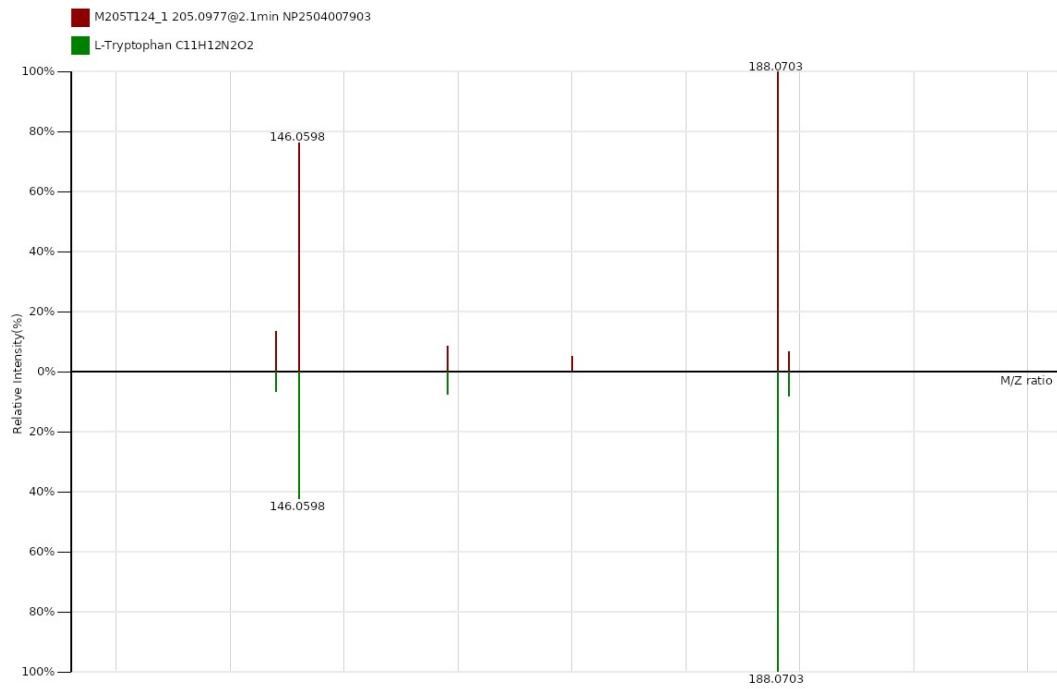

## L-Tyrosine

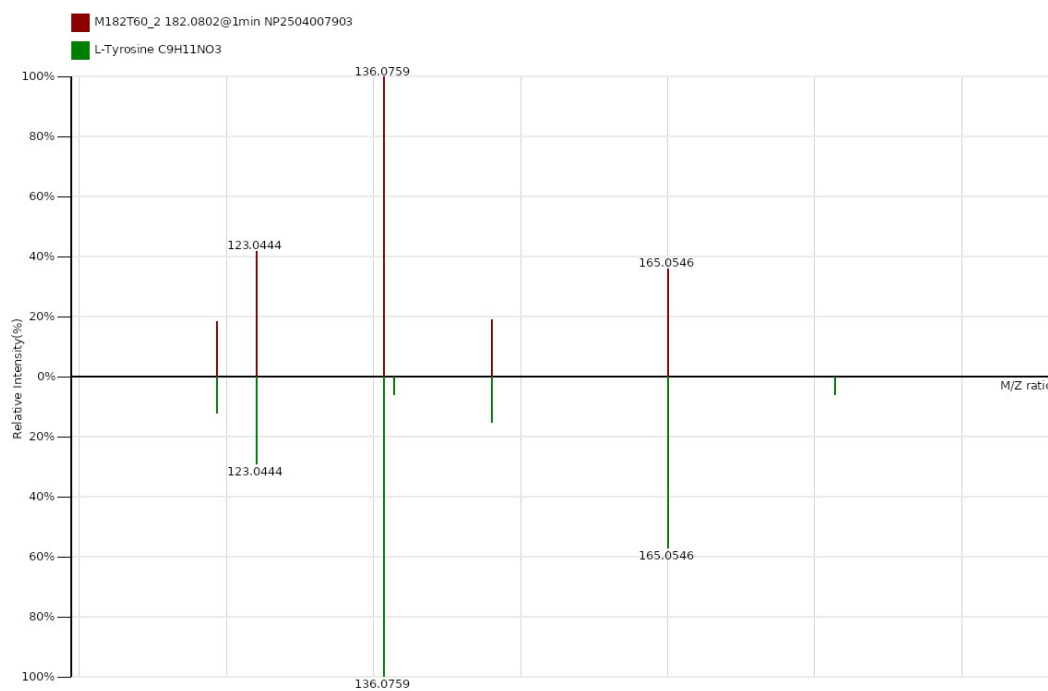

## N-alpha-acetylornithine

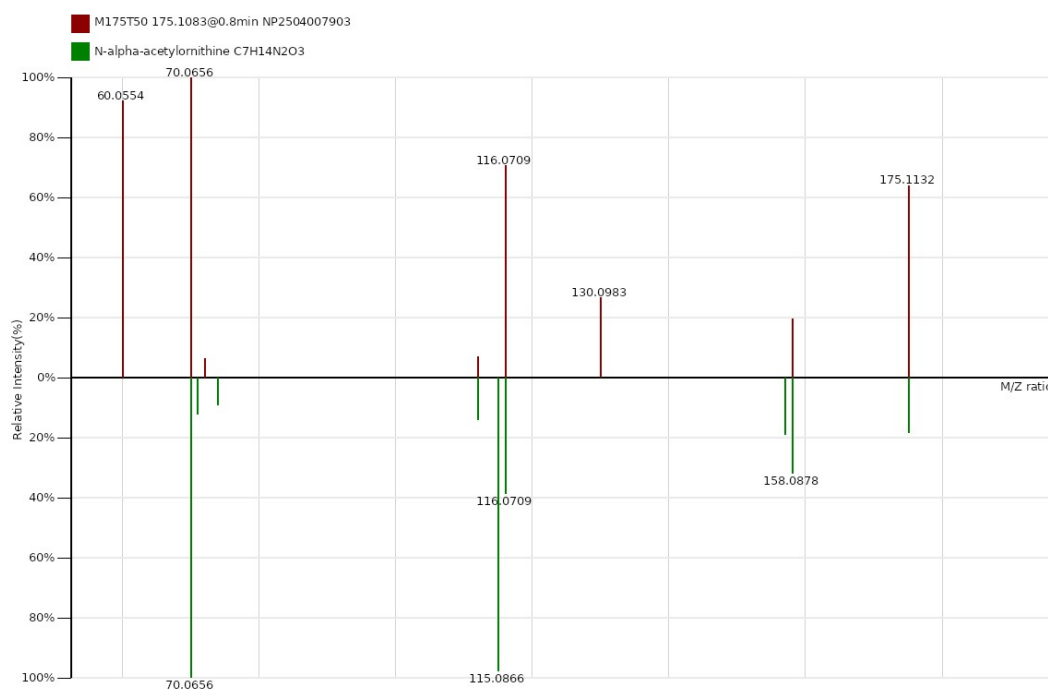

## Niacinamide

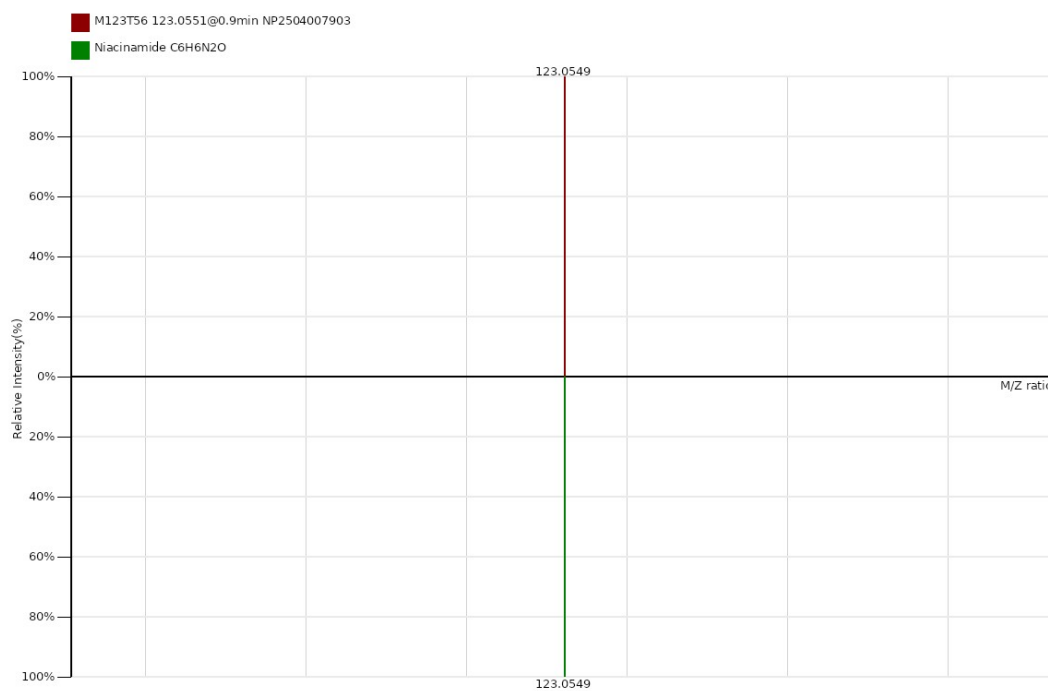

## Phosphonoacetaldehyde

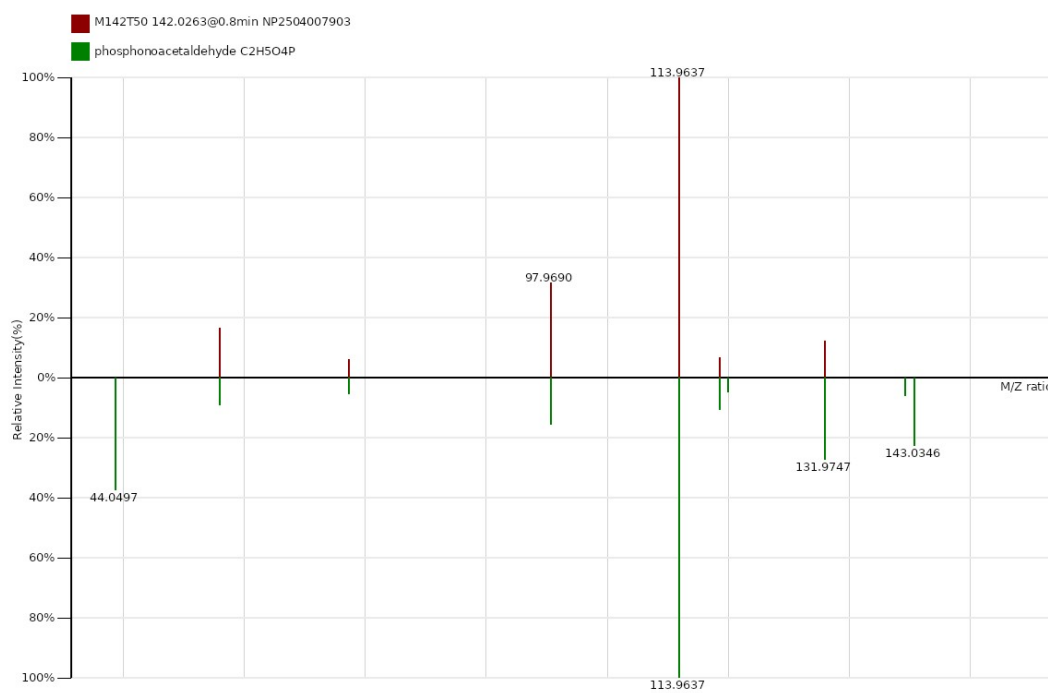

## Pyridoxine 5'-phosphate

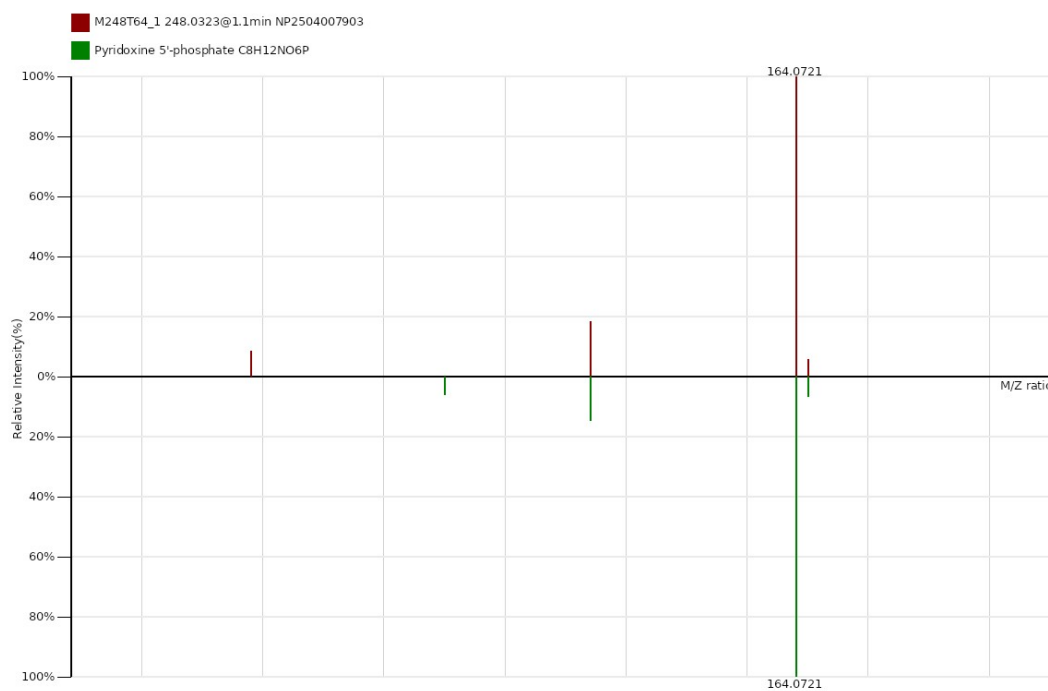

## Riboflavin (Vitamin B2)

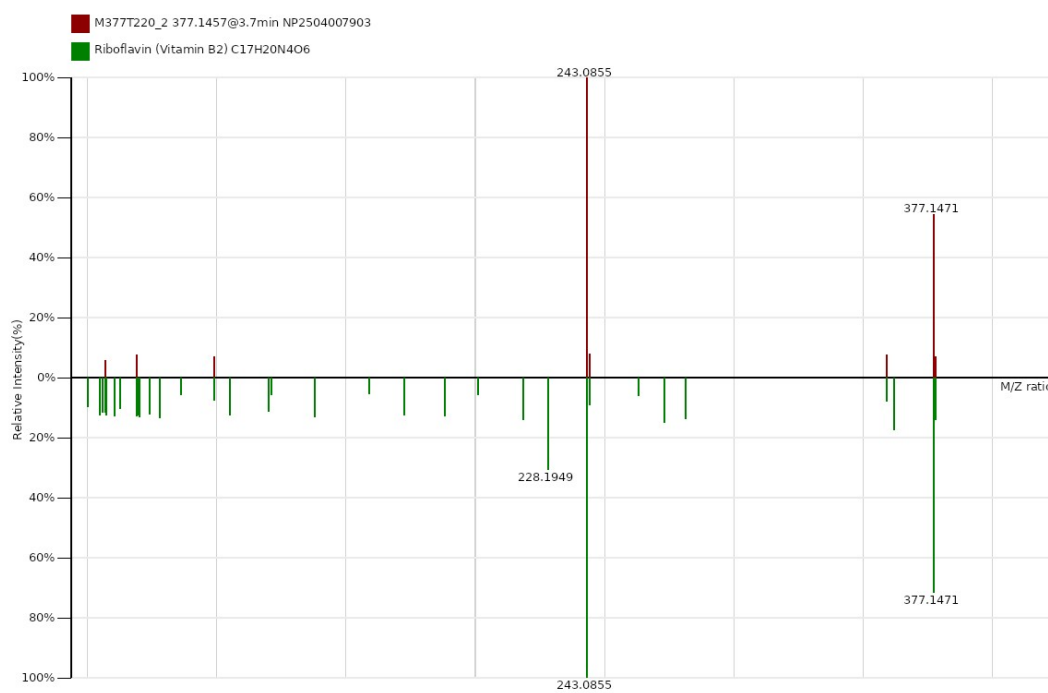

## Serotonin

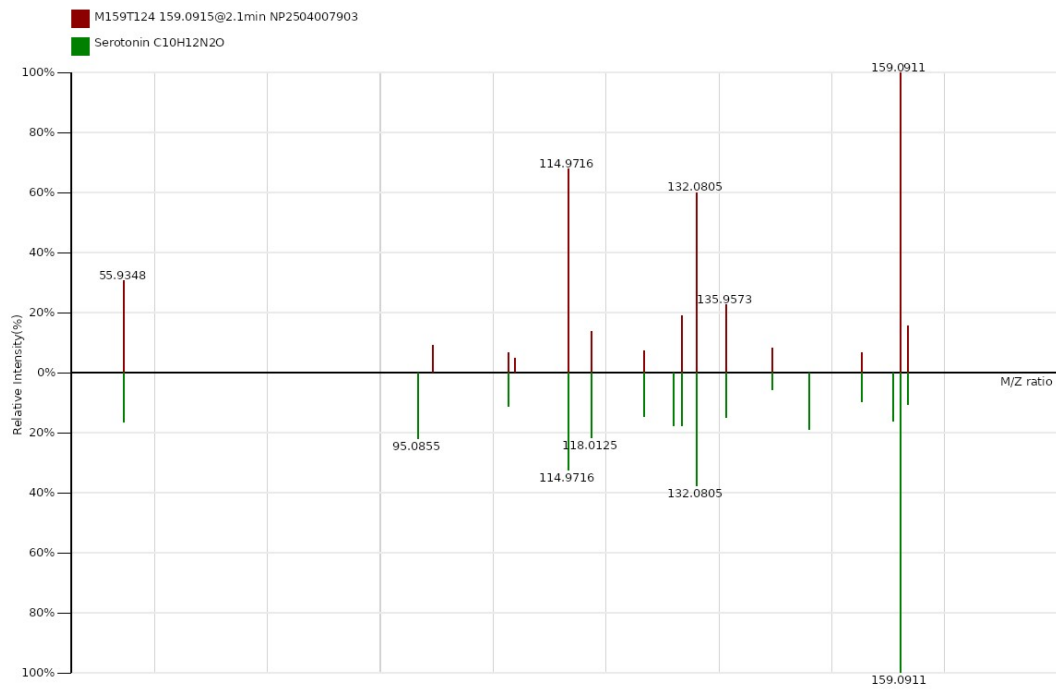

## Spermidine

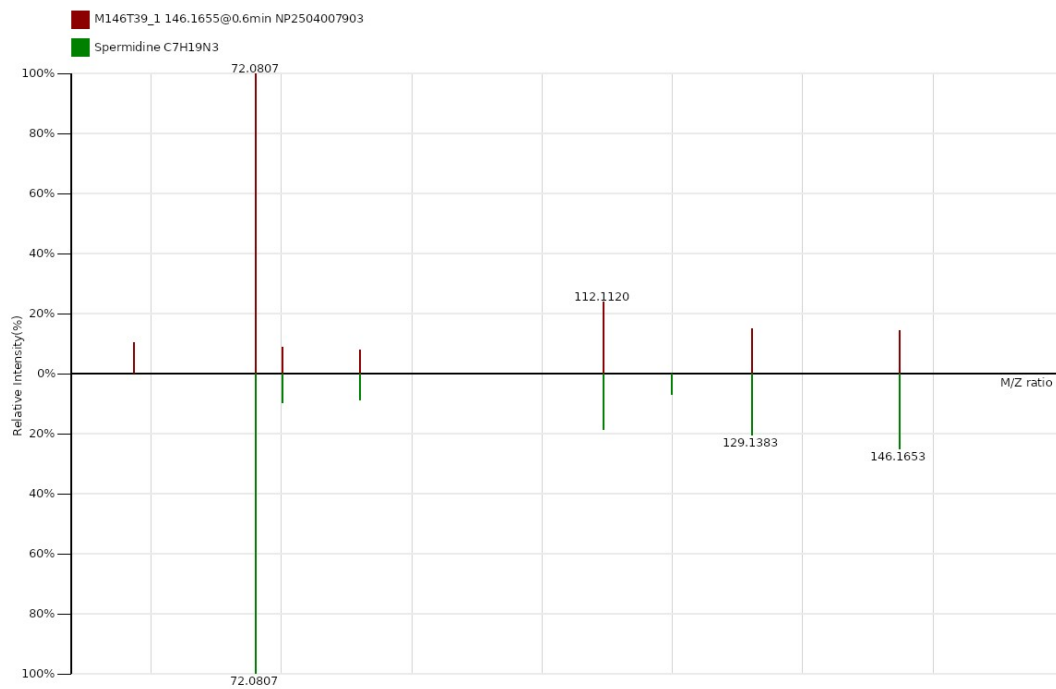

# Xanthine

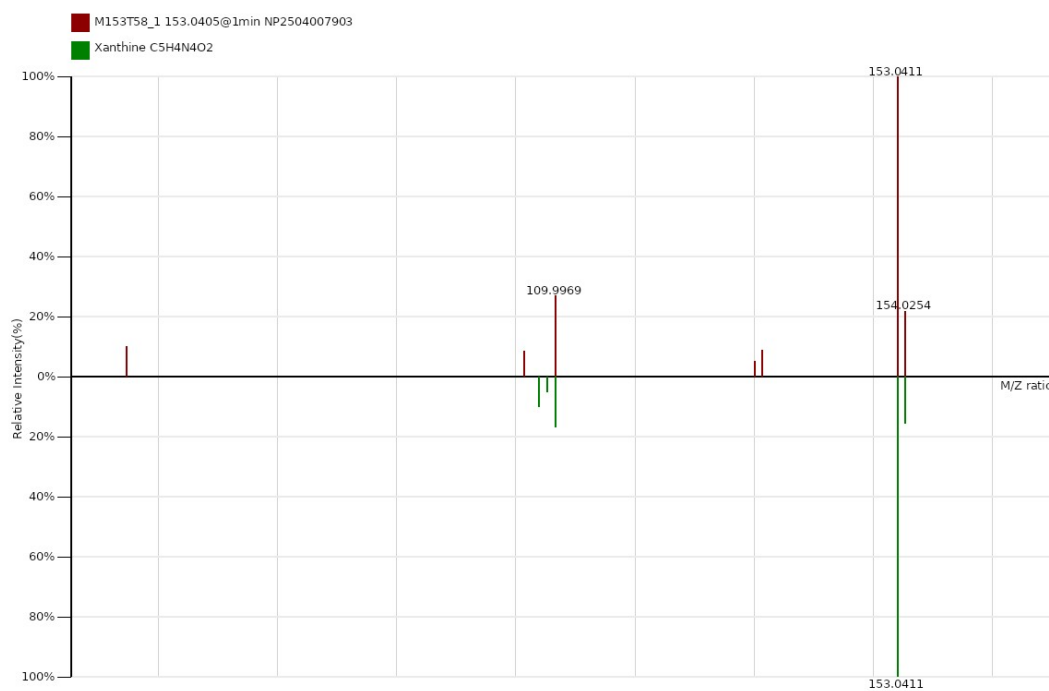

Supplement: d5fo05286f2.pdf [file d5fo05286f2.pdf]
